# Supplementary material for: Real time simulation for computational surgery: a review
Source: Springer Nature journal article supplement (doi:10.1186/2213-7467-1-11), 2014-01-01
Supplement: 40323_2013_11_MOESM5_ESM.pdf [file 40323_2013_11_MOESM5_ESM.pdf]

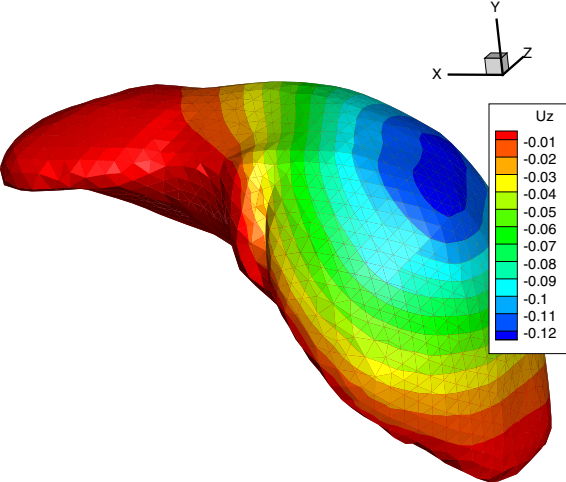

(a)

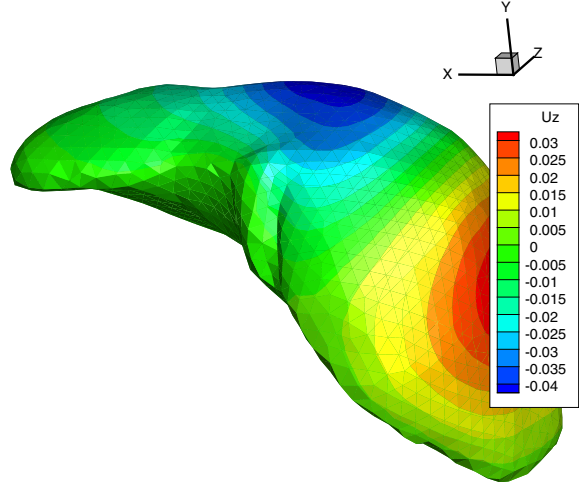

(b)

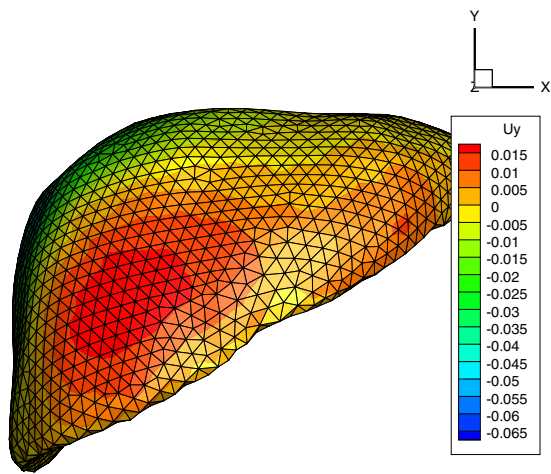

(c)

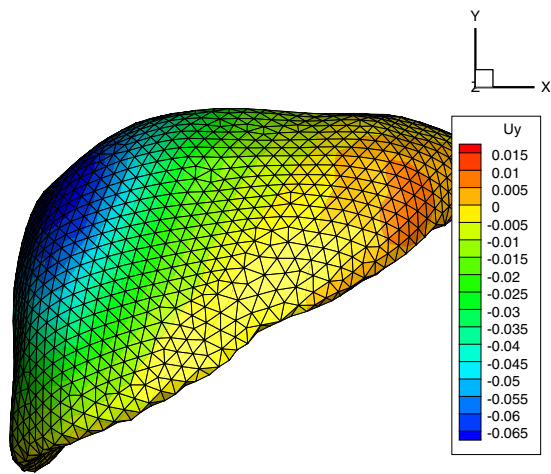

(d)
