# Supplementary material for: Real time simulation for computational surgery: a review
Source: Springer Nature journal article supplement (doi:10.1186/2213-7467-1-11), 2014-01-01

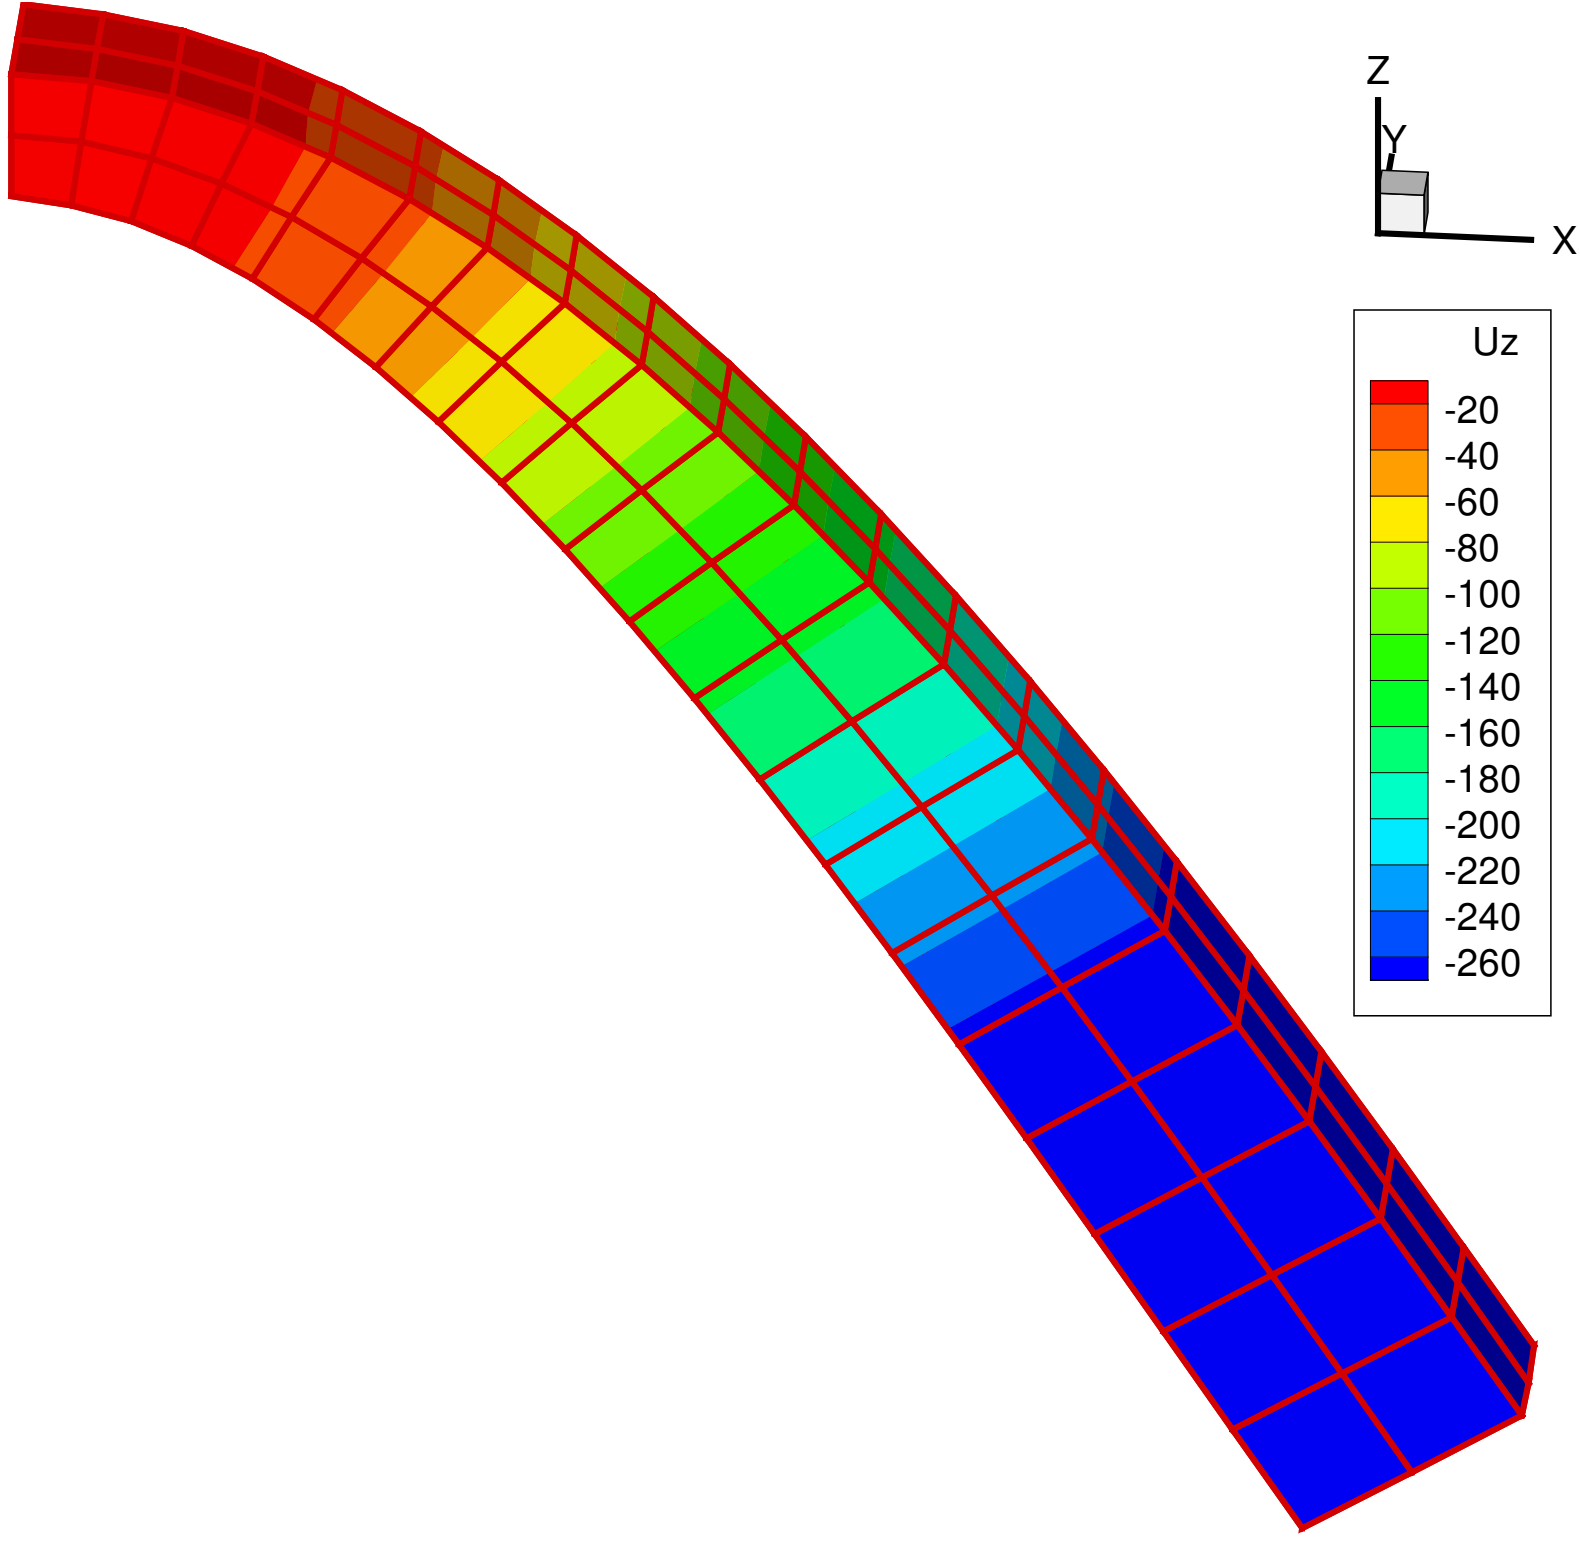

Supplement: 40323_2013_11_MOESM10_ESM.pdf [file 40323_2013_11_MOESM10_ESM.pdf]
