# Supplementary material for: Real time simulation for computational surgery: a review
Source: Springer Nature journal article supplement (doi:10.1186/2213-7467-1-11), 2014-01-01

“Haptic” device

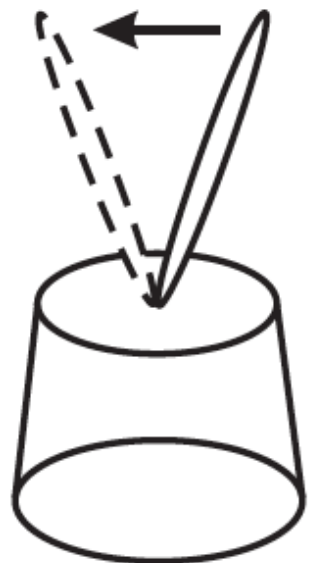

500Hz

Resulting Forces

Positions(x,y,z)

Deformation

Stress field

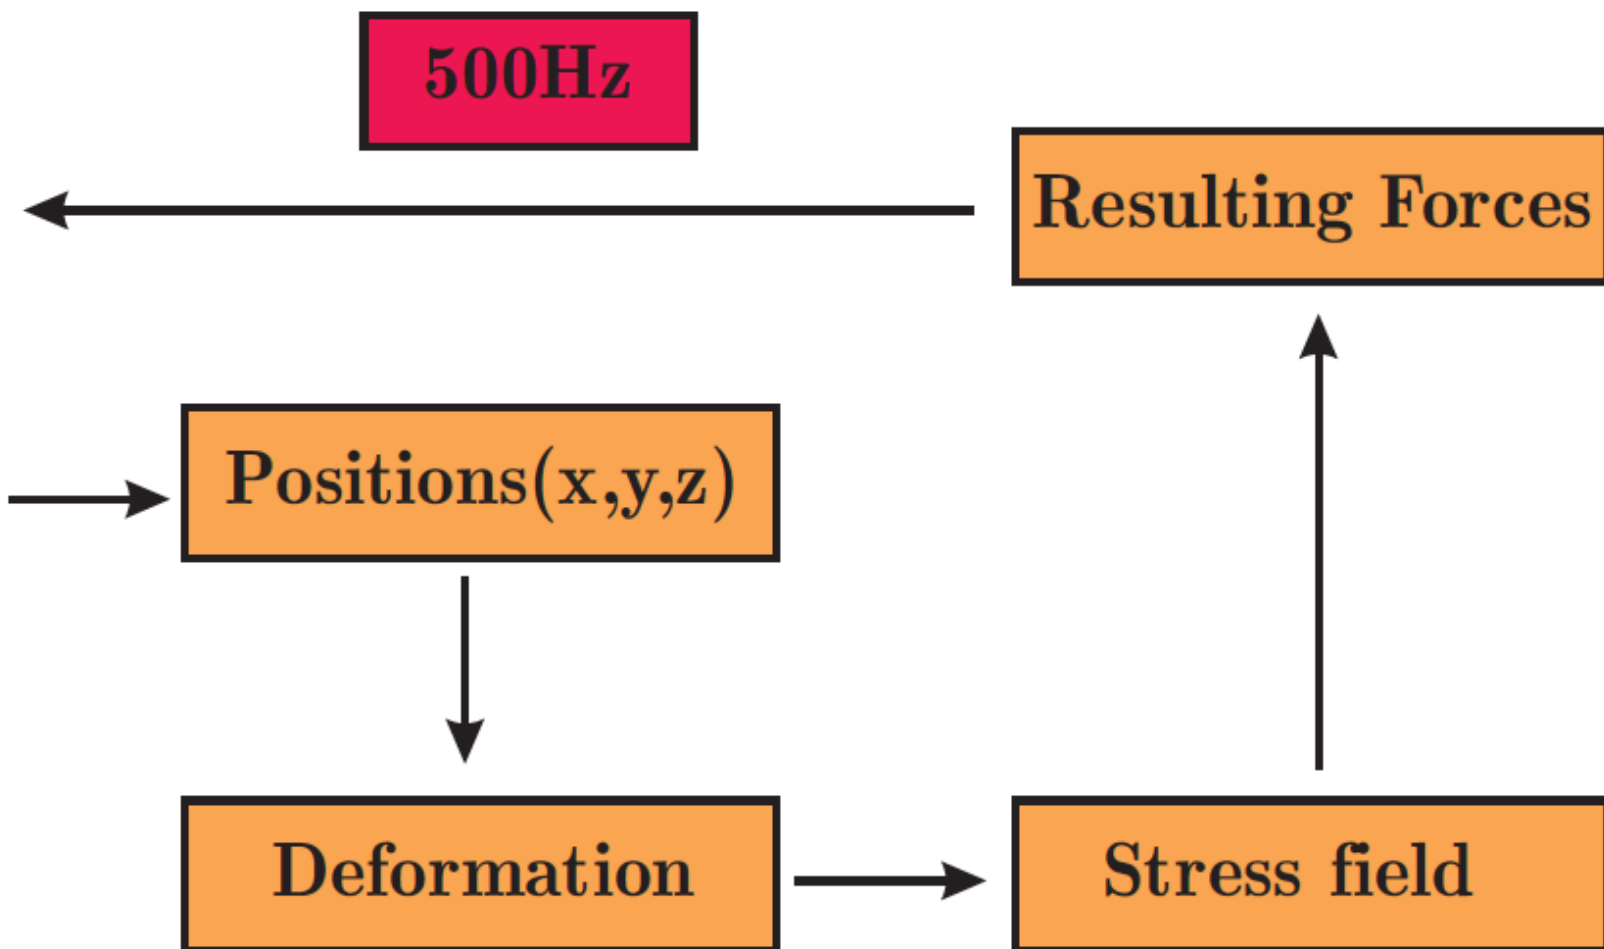

Supplement: 40323_2013_11_MOESM11_ESM.pdf [file 40323_2013_11_MOESM11_ESM.pdf]
